# Supplementary material for: Stereotype Threat Effect on CPR Performance: A Randomized Controlled Mannequin Study
Source: Research Square preprint supplement (doi:10.21203/rs.3.rs-3196901/v1), 2023-09-11
Supplement: Supplementary file 1 [file d4408635437a300217a03ca3.docx]

**APPENDIX 1: CPR EVALUATION FORM**

Please rate participants' CPR performance from 1 to 4 based on the questions below. (OB: observational)

**OB1. Are the chest compressions applied to the correct place?**

1. Completely wrong place (ex: abdomen)

2. Correct place - less than 50% of the time

3. Correct place - more than 50% of the time

4. Correct place

**OB2.Are the hands placed correctly?**

1. Hands/elbows completely wrong (eg: hands made into fists, elbows bent)
2. Hand position correct (but wrong angle or hands are not clasped)
3. Too close to the correct position and angle (the heel of the hand is in full contact and does not separate)
4. Completely in the correct position/angle and does not distort

**OB3. Is effective compression applied?**

1. Effective in less than 25% of the time
2. Effective in 25-50% of the time
3. Effective in 50-75% of the time
4. Effective in more than 75% of the time

**OB4. Is appropriate compression number per minute applied?**

1. Too fast or too slow
2. In correct range less than 50% of the time
3. In correct range, more than 50% of the time
4. In correct range all the time

**OB5. Is the compression depth appropriate?**

1. Too deep or too superficial
2. At the appropriate depth less than 50% of the time
3. At the appropriate depth more than 50% of the time
4. At the appropriate depth

**OB6. Is the rib cage allowed to retract?**

1- Not allowed

2- Allowed more than 50% of the time

3- Allowed more than 50% of the time

4- Allowed

**APPENDIX 2: MANNEQUIN SCORES**

Scores of cardiopulmonary resuscitation simulator mannequin (Resusci Anne Simulator®, 'Laerdal Medical'). (M: Mannequin)

**M1. Chest compression number per minute (n: 100-120)**

1. Too fast or too slow

2. In correct range less than 50% of the time

3. In correct range more than 50% of the time

4. In correct range all the time

**M2. Chest compression depth (n: 5-6 cm)**

1. Too deep or too superficial
2. At the appropriate depth less than 50% of the time
3. At the appropriate depth more than 50% of the time
4. At the appropriate depth

**M3. Are the chest compressions applied to the correct place?**

1. Completely wrong place (ex: abdomen)

2. Correct place - less than 50% of the time

3. Correct place - more than 50% of the time

4. Completely correct place indicate
